# Supplementary material
Source: PubMed Central journal article supplement (PMC5640512)
Supplement: mmc1.pdf [file mmc1.pdf]

**Current Biology, Volume 27**

**Supplemental Information**

**Modulation of Long-Range Connectivity Patterns  
via Frequency-Specific Stimulation of Human Cortex**

**Christiane A. Weinrich, John-Stuart Brittain, Magdalena Nowak, Reza Salimi-Khorshidi, Peter Brown, and Charlotte J. Stagg**

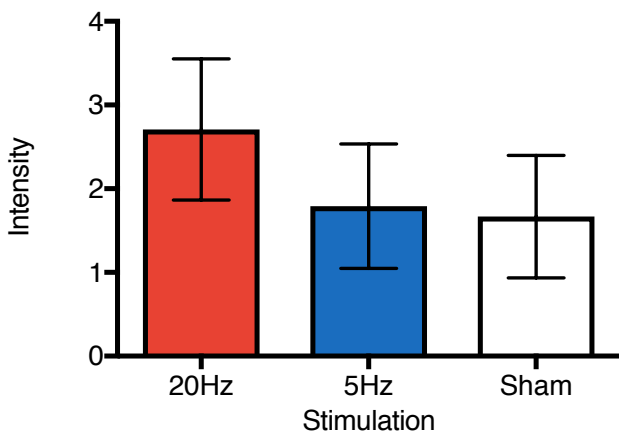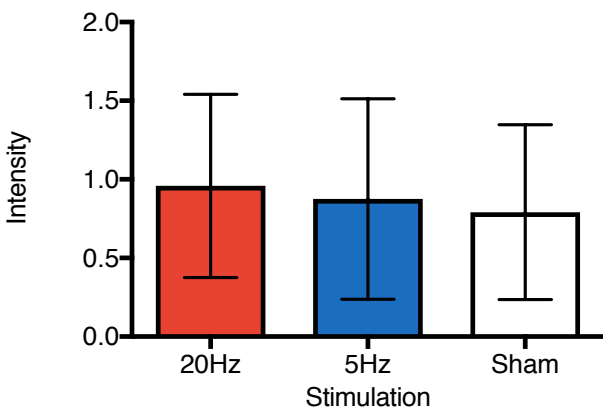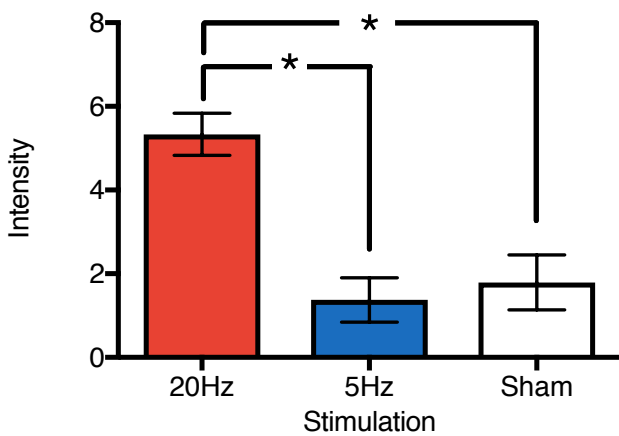

**Figure S1. Subject reported experience of tACS-induced phenomena, Related to Figure 1.**

Paraesthesia (A), pain (B), and phosphenes (C) were rated on a visual analogue scale from 0 -10. There was no difference in the perception of paraesthesia and pain between the three stimulation conditions (20Hz, 5Hz and Sham) (Repeated Measures ANOVA: sensation:  $F(2,22) = 1.73$ ,  $p = 0.20$ ; pain:  $F(1.108,12.186) = 0.33$ ,  $p = 0.60$ ). However, there was a significant difference in the strength of phosphenes perceived between the three stimulation conditions (Repeated Measures ANOVA:  $F(1.37, 15.01) = 28.52$ ,  $p < 0.001$ ). Phosphenes perceived during tACS with this electrode montage are likely to be due to direct stimulation of the retina, rather than reflecting stimulation of the occipital cortex [S1]. Subsequent post hoc t-tests revealed 20Hz stimulation elicited a significantly stronger perception of phosphenes compared with both sham and 5Hz stimulation (20Hz versus sham:  $t(11)=5.11$ ,  $p < 0,001$ ; 20Hz versus 5Hz:,  $t(11) = 6.20$ ,  $p < 0.001$  [corrected]). There was no significant relationship between phosphene rating during 20Hz tACS and the strength of the motor network in response to 20Hz tACS ( $r=0.32$ ,  $p=0.30$ ), nor between phosphene rating and the strength of the DMN during 20Hz tACS ( $0.47$ ,  $p=0.11$ ).

**A**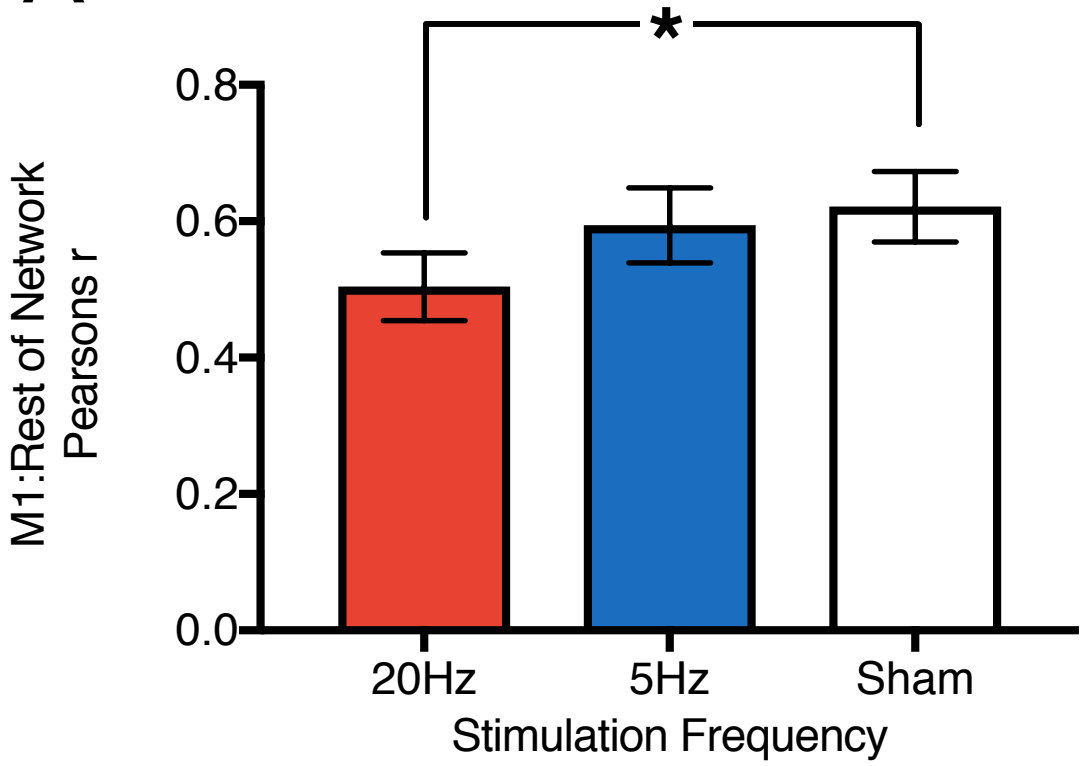**B**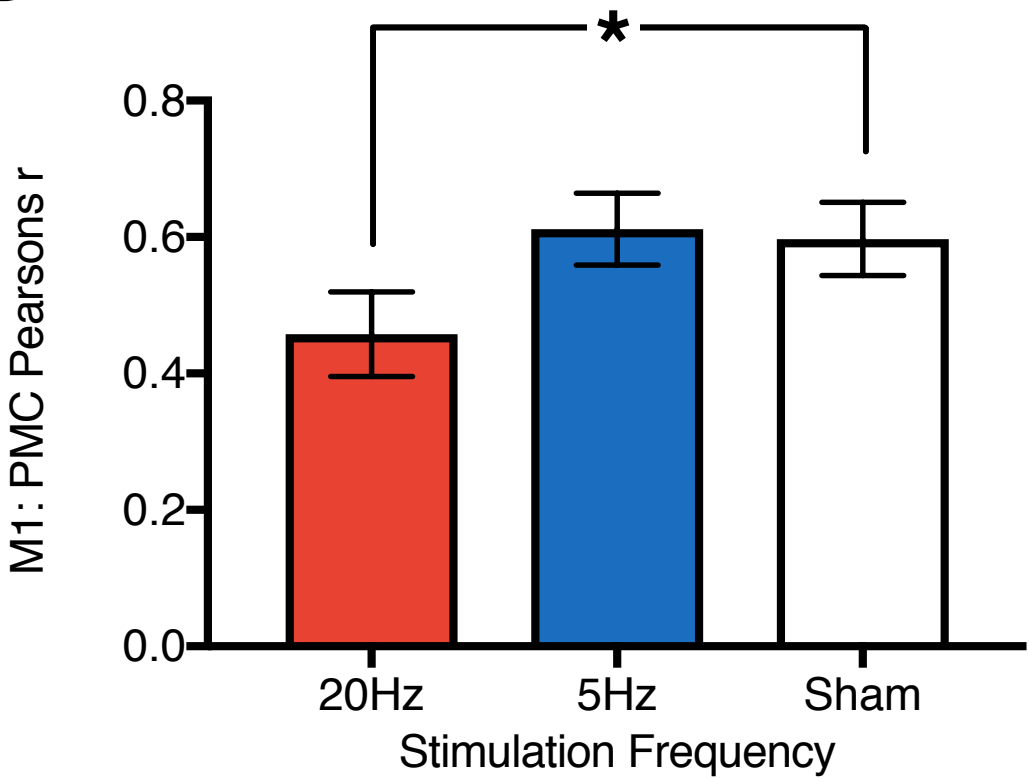

**Figure S2. Region of Interest analyses. Related to Figure 2.**

ROI analyses highlighting the change in connectivity between left M1 and (A) the motor network excluding the M1s bilaterally and (B) the left Premotor Cortex. Mean  $\pm$  SEM, \*  $p < 0.05$ .

## Supplemental References

- [S1] Schutter DJL, Hortensius R. (2010) Retinal origin of phosphenes to transcranial alternating current stimulation. *Clin Neurophysiol* 121, 1080–1084.
